# Supplementary material for: Structural insights into the cis and trans assembly of human trophoblast cell surface antigen 2
Source: PubMed Central journal article supplement — iScience. 2021 Sep 30;24(10):103190. doi: 10.1016/j.isci.2021.103190 (PMC8517388; doi:10.1016/j.isci.2021.103190), 2021-09-30
Supplement: mmc1.pdf [file mmc1.pdf]

iScience, Volume 24

**Supplemental information**

**Structural insights into the *cis*  
and *trans* assembly of human trophoblast  
cell surface antigen 2**

**Meng Sun, Helin Zhang, Min Jiang, Yan Chai, Jianxun Qi, George F. Gao, and Shuguang Tan**

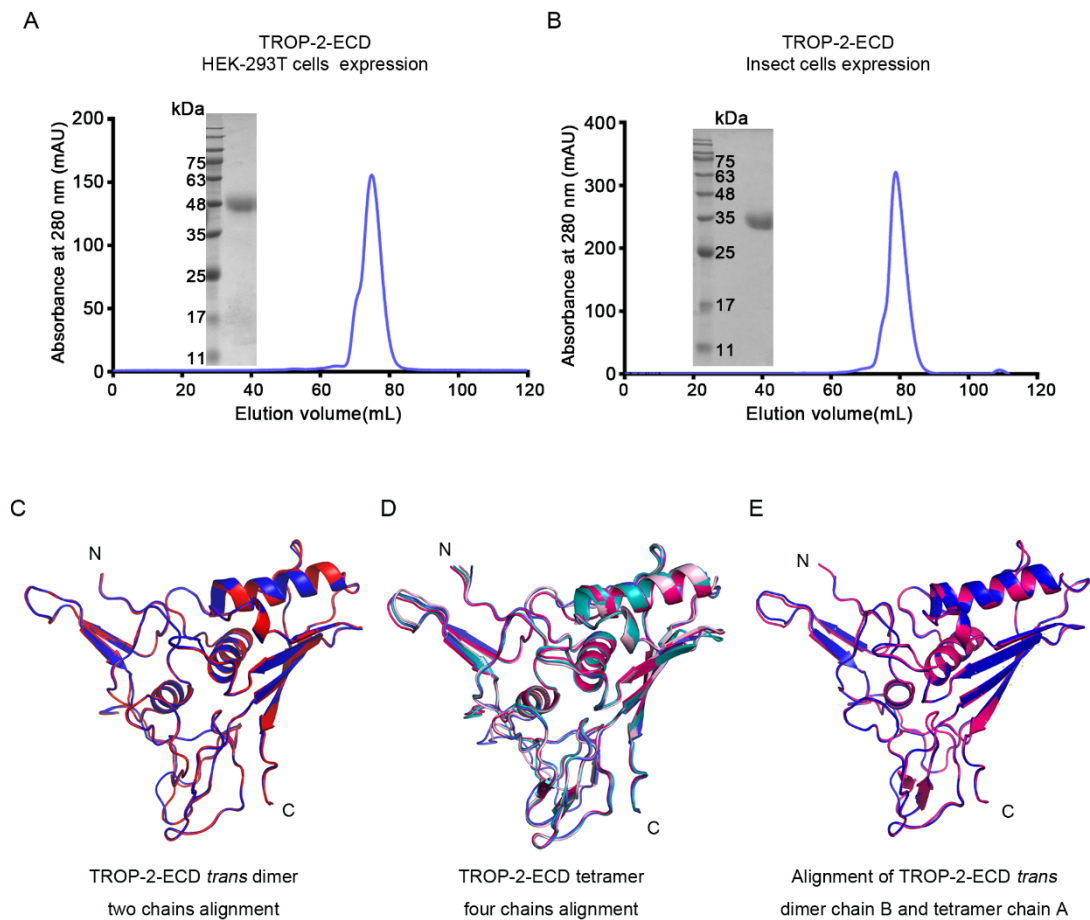

**Figure S1. Biophysical characterization of the TROP-2-ECD and comparison of the structural differences of the TROP-2-ECD subunits, related to Figures 1, 2 and 3**

(A-B) Size exclusion analysis of TROP-2-ECD proteins with Hiload Superdex 200 16/600 pg column. The 280-nm absorbance curve and the SDS-PAGE migration profile of the pooled sample are shown. (A) TROP-2-ECD proteins expressed from 293T cells. (B) TROP-2-ECD proteins expressed from insect cells. (C) Structural alignment of two protomers in TROP-2-ECD *trans*-dimer, with RMSD at 0.202. (D) Structural alignment of the four protomers in TROP-2-ECD tetramer, with RMSD between any of the two protomers ranged from 0.255 to 0.390. (E) Structural alignment between one subunit (chain B) of *trans*-dimer and one unit (chain A) of the tetramer, with RMSD at 0.232.

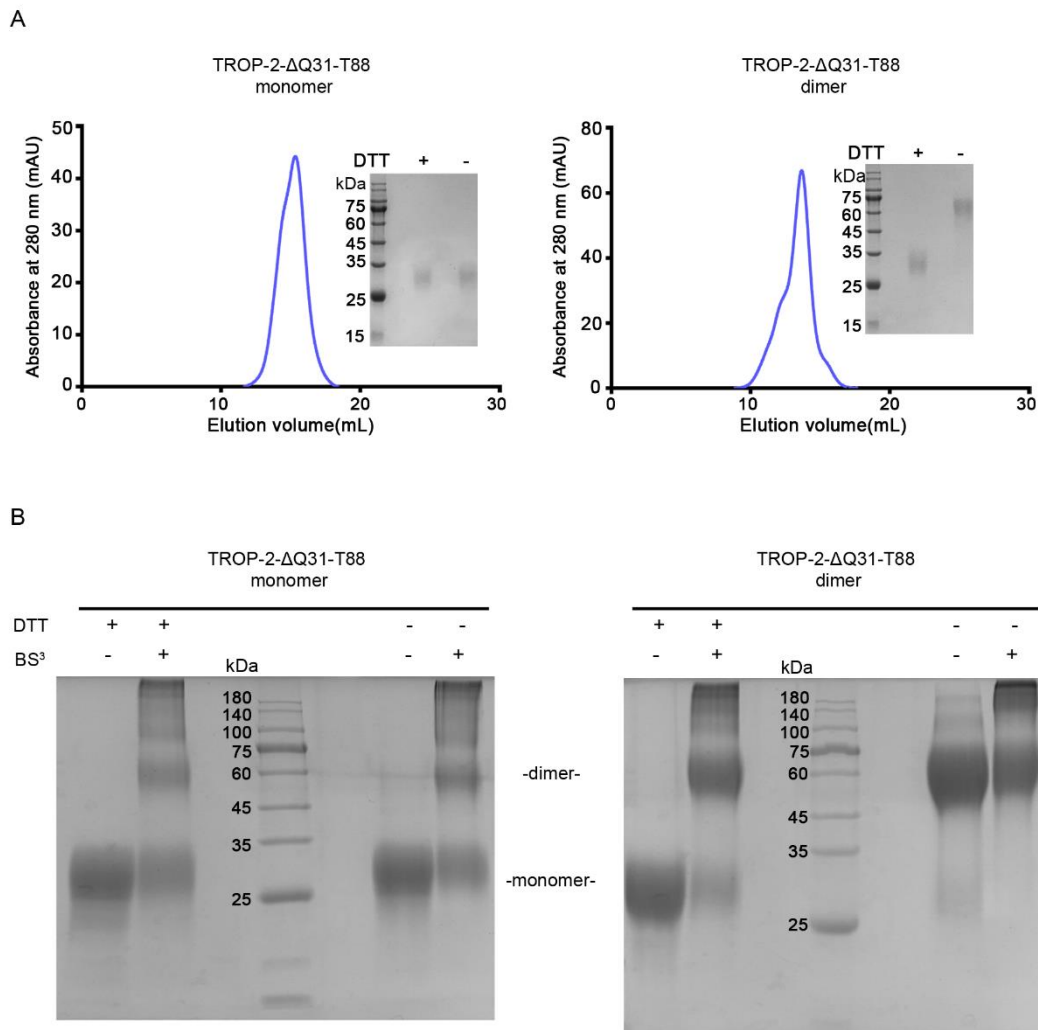

**Figure S2. Preparation of monomeric and dimeric TROP-2-ΔQ31-T88 proteins and cross-linking analysis, related to Figure 1.**

(A) Size exclusion analysis of monomeric (left) or dimeric TROP-2-ΔQ31-T88 proteins (right) with Superdex 200 Increase 10/300 GL column. The 280-nm absorbance curve and the SDS-PAGE migration profile of the pooled sample are shown. (B) Coomassie Blue staining SDS-PAGE analysis of cross-linked states of monomeric (left) or dimeric TROP-2-ΔQ31-T88 proteins (right) expressed from HEK-293T cells under reducing (with DTT) or non-reducing (without DTT) conditions. Both TROP-2-ΔQ31-T88 monomer and dimer can be cross-linked by the addition of BS<sup>3</sup> (bis (sulfosuccinimidyl) suberate) and presented as higher levels of oligomers.

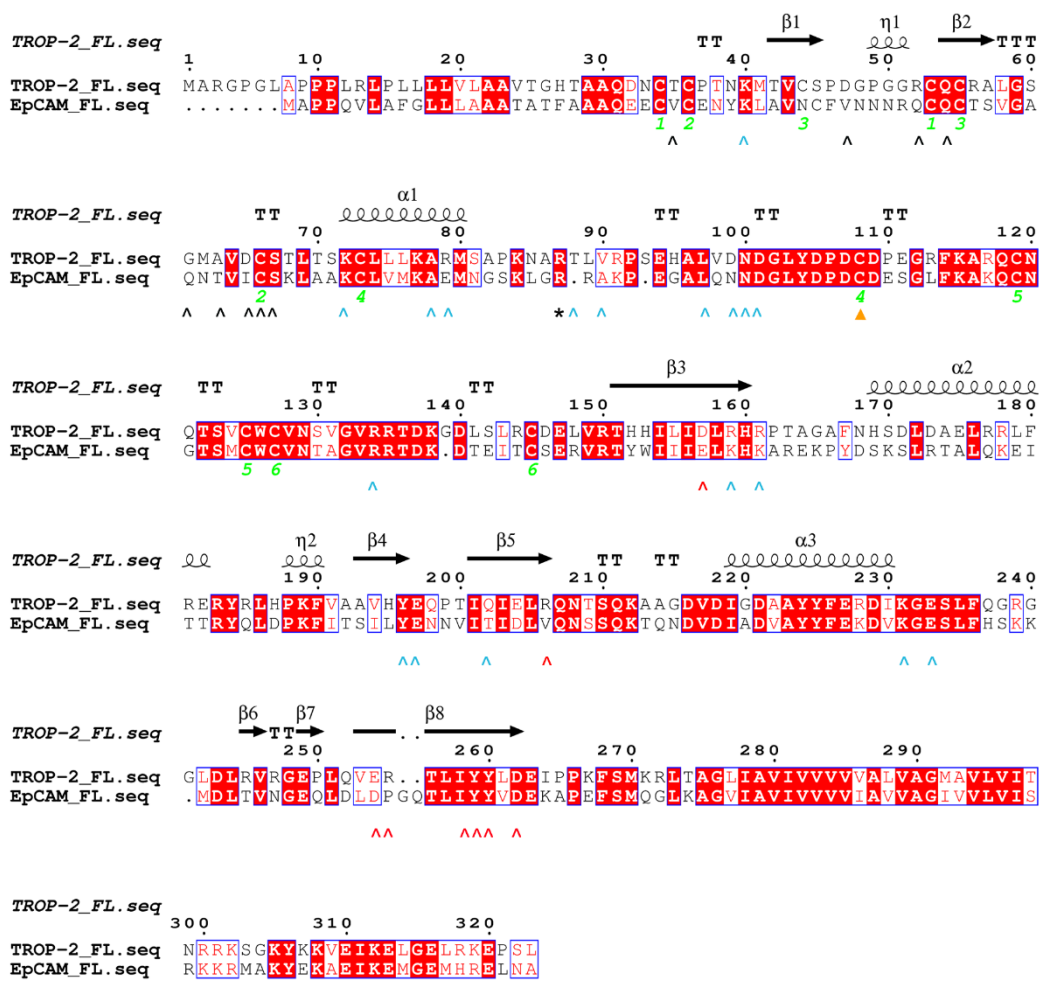

**Figure S3. Sequence alignment of TROP-2 and EpCAM, related to Figure 1.**  
 The alignment is numbered concerning the TROP-2 sequence, and the secondary structure of TROP-2 is shown above the alignment. The red, blue, and black arrows below the sequence represent hydrogen bond interactions in *trans*-, *cis*-dimer, and *cis*-tetramerization interface mediated by the N-terminal CRD respectively.

A

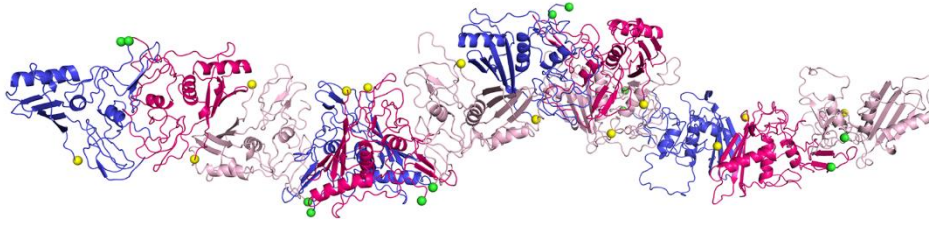

B

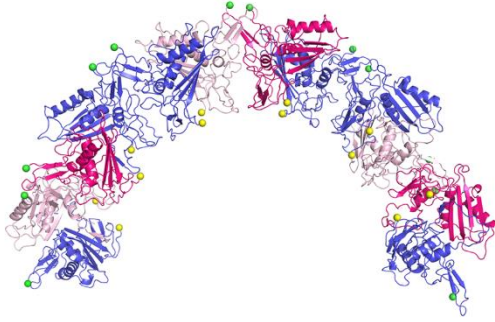

C

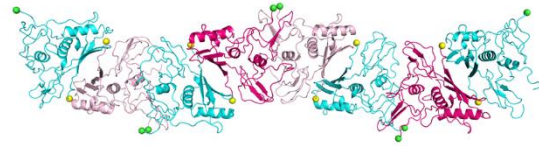

**Figure S4. Varied types of intercellular TROP-2 assembly model, related to Figure 3.**

(A) The connection of TROP-2-ECD *cis*- and *trans*-dimers mediated by CRD domain. (B) The oligomer all composed of *cis*-dimers of TROP-2-ECD. (C) The oligomer is composed of TROP-2-ECD *trans*-dimers. All the green spheres represent N-termini, and the yellow spheres represent C-termini.

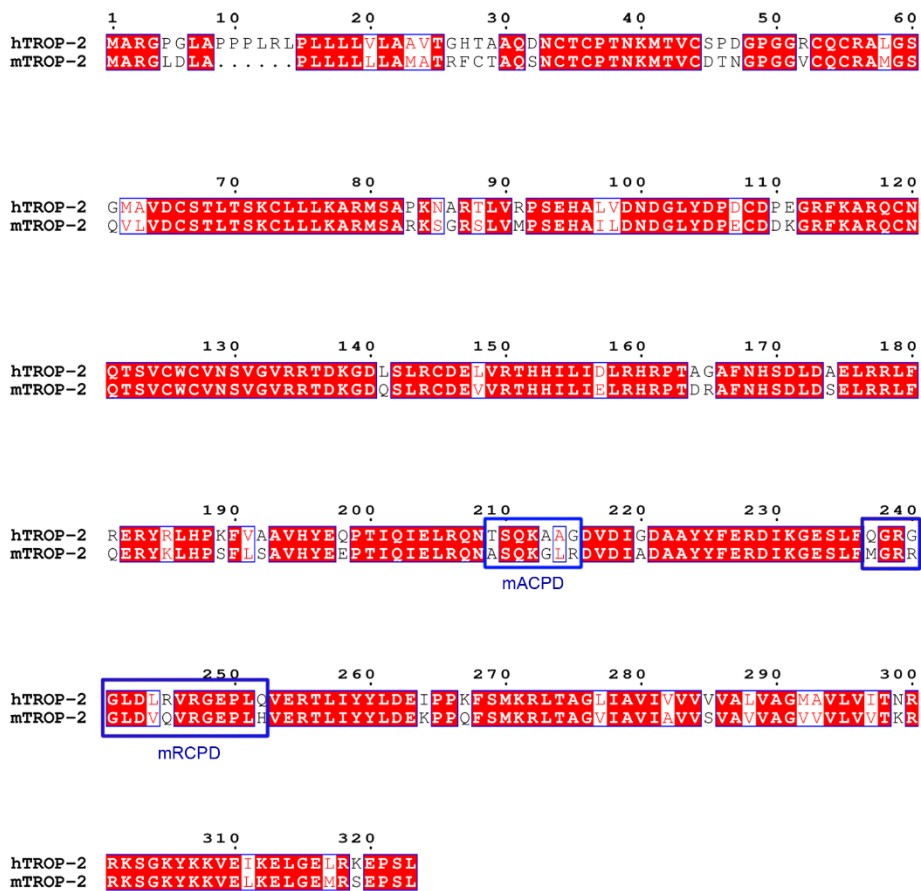

**Figure S5. Sequence alignment of human and mouse TROP-2, related to Figure 5.** The alignment is numbered concerning the TROP-2 sequence. The residues in the blue rectangular box indicate the two loops in CPD domain, Q237-Q252 for mRCPD and T209-G215 for mACPD, that have been replaced to define the binding region of sacituzumab.

**Table S1. Crystallographic data collection and refinement statistics, related to Figures 2 and 3.**

|                                   | TROP-2-ECD <i>trans</i> -assembly | TROP-2-ECD <i>cis</i> -assembly |
|-----------------------------------|-----------------------------------|---------------------------------|
| <b>Data collection</b>            |                                   |                                 |
| Space group                       | P 1 21 1                          | P 43 2 2                        |
| Wavelength (Å)                    | 0.97853                           | 0.97890                         |
| Unit cell dimensions              |                                   |                                 |
| a, b, c (Å)                       | 51.54, 126.88, 54.07              | 145.14, 145.14, 217.72          |
| $\alpha$ , $\beta$ , $\gamma$ (°) | 90.00, 118.39, 90.00              | 90.00, 90.00, 90.00             |
| Resolution (Å)                    | 45.34-3.19                        | 50-3.20                         |
| No. reflections                   | 7911                              | 38952                           |
| $R_{merge}$                       | 0.179/0.900                       | 0.193/0.851                     |
| $I/\sigma$                        | 8.832 (1.668)*                    | 13.677 (2.821)                  |
| Completeness (%)                  | 77.42                             | 99.5                            |
| Redundancy                        | 6.2 (6.3)                         | 11.6 (12.2)                     |
| <b>Refinement</b>                 |                                   |                                 |
| Resolution (Å)                    | 45.34-3.19                        | 49.95-3.20                      |
| $R_{work} / R_{free}$             | 0.239/0.284                       | 0.241/0.276                     |
| No. atoms                         | 3690                              | 7399                            |
| Protein                           | 3000                              | 7399                            |
| Ligands                           | 0                                 | 0                               |
| Water                             | 0                                 | 0                               |
| <b>R.m.s. deviations</b>          |                                   |                                 |
| Bond lengths (Å)                  | 0.003                             | 0.003                           |
| Bond angles (°)                   | 0.689                             | 0.807                           |
| <b>Ramachandran plot</b>          |                                   |                                 |
| Favored (%)                       | 92.74                             | 98.39                           |
| Allowed (%)                       | 6.84                              | 1.61                            |
| Outliers (%)                      | 0.43                              | 0.00                            |

\*Values in parentheses are for highest-resolution shell.

**Table S2. Residues contributed to *trans*-dimer interaction of TROP-2-ECD, related to Figure 2.**

| Chain A | Chain B                      | Contacts                |
|---------|------------------------------|-------------------------|
| E197    | D101                         | 15 (3) <sup>b</sup>     |
| Q198    | D101                         | 2 <sup>a</sup>          |
| L261    | H153, E204, L261, R206       | 12, 3, 1, 5             |
| Y259    | L155, D157, Q202, L257, Y259 | 5, 10 (1), 6, 1, 15 (1) |
| L257    | D157, R255, L257, Y259       | 1, 1, 1, 1              |
| F268    | H169, D173, V194, H195       | 12, 5, 5, 5             |
| P265    | A292                         | 5                       |
| P266    | A292, H195                   | 5, 5                    |
| D101    | E197, Q198                   | 11 (3), 3 (1),          |
| R134    | E197                         | 1                       |
| Y260    | E204                         | 1                       |
| H152    | R260                         | 2 (1)                   |
| R255    | L257                         | 1                       |
| L155    | Y259                         | 5                       |
| Q202    | Y259                         | 6                       |
| D157    | Y259                         | 7 (1)                   |
| E204    | Y260, L261                   | 1, 3,                   |
| H153    | L261                         | 13                      |
| A192    | P265, P266                   | 5, 1                    |
| A193    | P266                         | 5                       |
| H195    | P266, F268                   | 4, 3                    |
| D173    | F268                         | 1                       |
| H169    | F268                         | 13                      |
| V194    | F268                         | 4                       |

<sup>a</sup>Numbers represent the number of atom-to-atom contacts between residues of different chains of TROP-2-ECD, which were analyzed by the contact program in CCP4 suite (the distance cutoff is 4.5 Å).

<sup>b</sup>Numbers in the parentheses represent the number of potential hydrogen bonds (the distance cutoff is 3.5 Å).



**Table S3. Residues contributed to *cis*-dimer interaction of TROP-2-ECD, related Figure 2 and 3.**

| Chain A | Chain B                            | Contacts               |
|---------|------------------------------------|------------------------|
| K40     | E254, R161                         | 13 <sup>a</sup> , 3    |
| M41     | R255                               | 2                      |
| L58     | R159                               | 1                      |
| K72     | D99                                | 1                      |
| R79     | R255, L257                         | 7 (1) <sup>b</sup> , 1 |
| M80     | L257                               | 4                      |
| S81     | R255                               | 1                      |
| P83     | T200                               | 1                      |
| A86     | E197                               | 5                      |
| R87     | E197                               | 4                      |
| T88     | E197, H195, Y196                   | 11 (2), 5, 3 (1)       |
| L89     | Q202, E197, T200, H195, Y196       | 15, 1, 1, 1, 1         |
| V90     | Q202, E204, L155, H195             | 13 (2), 6, 4, 4        |
| R91     | L155                               | 2                      |
| P92     | L155, Y259                         | 2, 12                  |
| S93     | L261                               | 6                      |
| H95     | L261, P265, P266                   | 3, 3, 3                |
| A96     | P261, Y260, Y259                   | 5, 7, 1                |
| L97     | Y260, Y259, I258, N129, V133, D262 | 17 (2), 2, 1, 1, 2, 1  |
| V98     | Y260, I258, V133, Y259             | 1, 4, 3, 5             |
| D99     | V133, Y260, G102, D101, K72        | 7, 11 (1), 4, 4, 3 (1) |
| N100    | D101, G102, D99                    | 17 (1), 5, 1           |
| D101    | R134                               | 4 (1)                  |
| L103    | L257                               | 1                      |
| N129    | L97                                | 1                      |
| V133    | L97, D99                           | 6, 1                   |
| R134    | L97                                | 4                      |
| R135    | L97                                | 1                      |
| L155    | P92, V90                           | 5, 2                   |
| R159    | P83, S81, R79, A78                 | 1, 5, 5 (1), 3 (1)     |
| R161    | K40, L58, M41                      | 7 (1), 1, 1            |
| H195    | L81, V90                           | 3, 3                   |
| Y196    | T88, L89                           | 3, 2                   |
| E197    | L89, T88, R87                      | 6, 13, 4               |
| T200    | L89, P83                           | 6, 2                   |
| Q202    | L89, V90                           | 15, 15 (1)             |
| V204    | V90                                | 2                      |

|      |                        |                      |
|------|------------------------|----------------------|
| E227 | D99                    | 1                    |
| K231 | K231, D101             | 5, 7                 |
| E233 | R254, R255, K231, T256 | 6, 7, 3 (1), 8       |
| G238 | R161                   | 1                    |
| R239 | R161                   | 5                    |
| G240 | R261                   | 5                    |
| Q252 | E233                   | 6                    |
| V253 | E233                   | 5                    |
| E254 | R79, M41               | 6 (1), 4             |
| R255 | R79, M80, P83, A82     | 3, 2, 1, 2           |
| T256 | D99                    | 1                    |
| L257 | D99, N100              | 2, 2                 |
| I258 | D99, L97, V98          | 14 (1), 1, 2         |
| Y259 | L97, A96, P92, V98     | 6, 1, 14, 6          |
| Y260 | L97, H95, A96, D99     | 14 (2), 1, 3, 10 (1) |
| L261 | S93, H95, A96          | 2, 3, 2              |
| D262 | L97                    | 1                    |
| P265 | H95                    | 5                    |
| P266 | L97, H95               | 3, 2                 |

---

<sup>a</sup>Numbers represent the number of atom-to-atom contacts between residues of different chains of TROP-2-ECD, which were analyzed by the contact program in CCP4 suite (the distance cutoff is 4.5 Å).

<sup>b</sup>Numbers in the parentheses represent the number of potential hydrogen bonds (the distance cutoff is 3.5 Å).

**Table S4. Residues contributed to *cis*-tetramer interaction of TROP-2-ECD, related to Figure 3.**

| Chain C | Chain A                 | Contacts               |
|---------|-------------------------|------------------------|
| N33     | R52                     | 1 <sup>a</sup>         |
| C34     | R52                     | 1                      |
| T35     | R52, P49                | 5 (1) <sup>b</sup> , 1 |
| C36     | R52                     | 2                      |
| P37     | P49, R52                | 4, 1                   |
| D47     | D65, S67                | 3, 3 (1)               |
| G48     | S67                     | 4                      |
| P49     | S67, P37, C66           | 5, 2, 6                |
| R52     | C53, T35, C34, N33      | 10, 9 (1), 1, 1        |
| C53     | R52                     | 8                      |
| Q54     | V64, D65, C66, S67      | 3, 17 (1), 6 (1), 2    |
| R56     | A63                     | 2                      |
| G59     | P110                    | 4                      |
| S60     | P110, M62,              | 8, 3                   |
| G61     | P110, M62, A63          | 7, 6, 4 (1)            |
| M62     | M62, G61, A63, S60      | 14, 6, 6, 2            |
| A63     | G61, M62, A63, C55, R56 | 4, 6, 9, 1, 2          |
| V64     | Q54                     | 2                      |
| D65     | Q54, D47                | 5 (1), 1               |
| C66     | Q54, P49, R52           | 6, 7, 2                |
| S67     | D47, P49, G48, Q54      | 3 (1), 3, 4, 1         |
| P110    | G59, S60, G61           | 4, 6, 1                |
| T122    | R144                    | 1                      |
| L141    | L141                    | 2                      |
| R144    | T122                    | 1                      |

<sup>a</sup>Numbers represent the number of atom-to-atom contacts between residues of different chains of TROP-2-ECD, which were analyzed by the contact program in CCP4 suite (the distance cutoff is 4.5 Å).

<sup>b</sup>Numbers in the parentheses represent the number of potential hydrogen bonds (the distance cutoff is 3.5 Å).
